# Supplementary material for: Effects of epigenetic pathway inhibitors on corticotroph tumour AtT20 cells
Source: PubMed Central journal article supplement (PMC7040567; doi:10.1530/erc-19-0448), 2020-01-13
Supplement: supplementary_figure_1.pdf [file supplementary_figure_1.pdf]

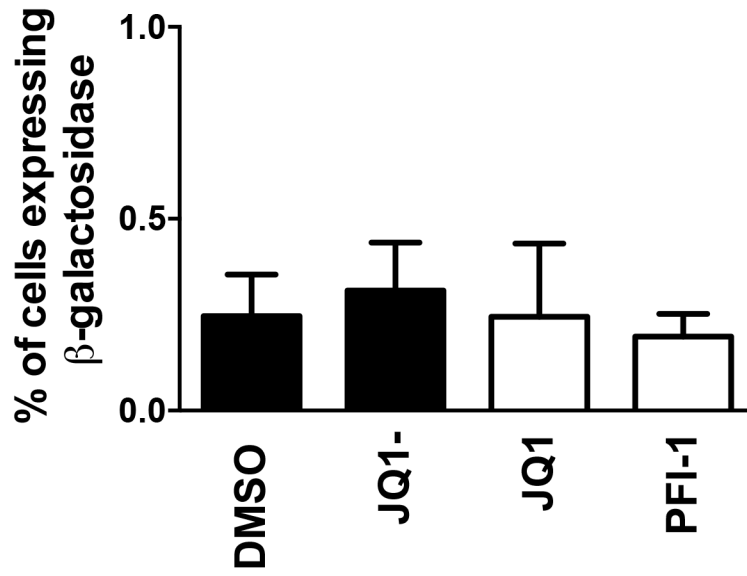

**Supplementary Figure 1.** Cellular senescence analysis. The level of cellular senescence of AtT20 cells was measured, 96h after compound treatment by determining the percentage of cells staining positively for  $\beta$ -galactosidase.
