# Supplementary material for: Effects of epigenetic pathway inhibitors on corticotroph tumour AtT20 cells
Source: PubMed Central journal article supplement (PMC7040567; doi:10.1530/erc-19-0448), 2020-01-13
Supplement: supplementary_figure_2.pdf [file supplementary_figure_2.pdf]

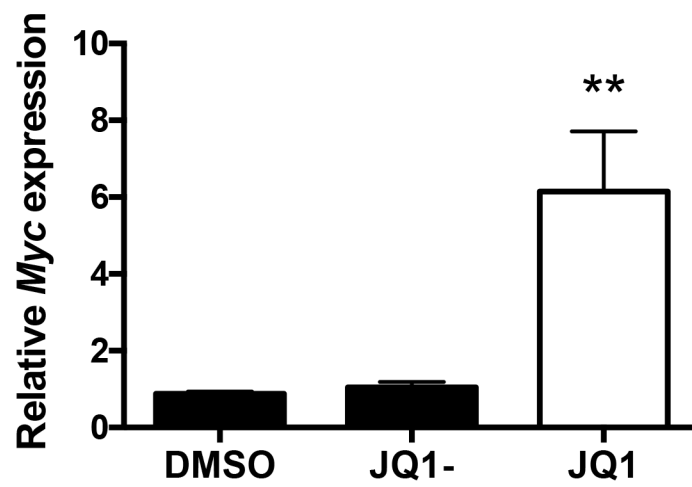

**Supplementary Figure 2.** Expression of *Myc* in AtT20 cells after JQ1 treatment. *Myc* expression was evaluated using qRT-PCR after 96h treatment with DMSO and JQ1- control treatments, or JQ1 drug. N=4 biological replicates; \*\*p<0.005 by one-way annova relative to DMSO control.
