# Supplementary material for: Effects of epigenetic pathway inhibitors on corticotroph tumour AtT20 cells
Source: PubMed Central journal article supplement (PMC7040567; doi:10.1530/erc-19-0448), 2020-01-13
Supplement: supplementary_figure_3.pdf [file supplementary_figure_3.pdf]

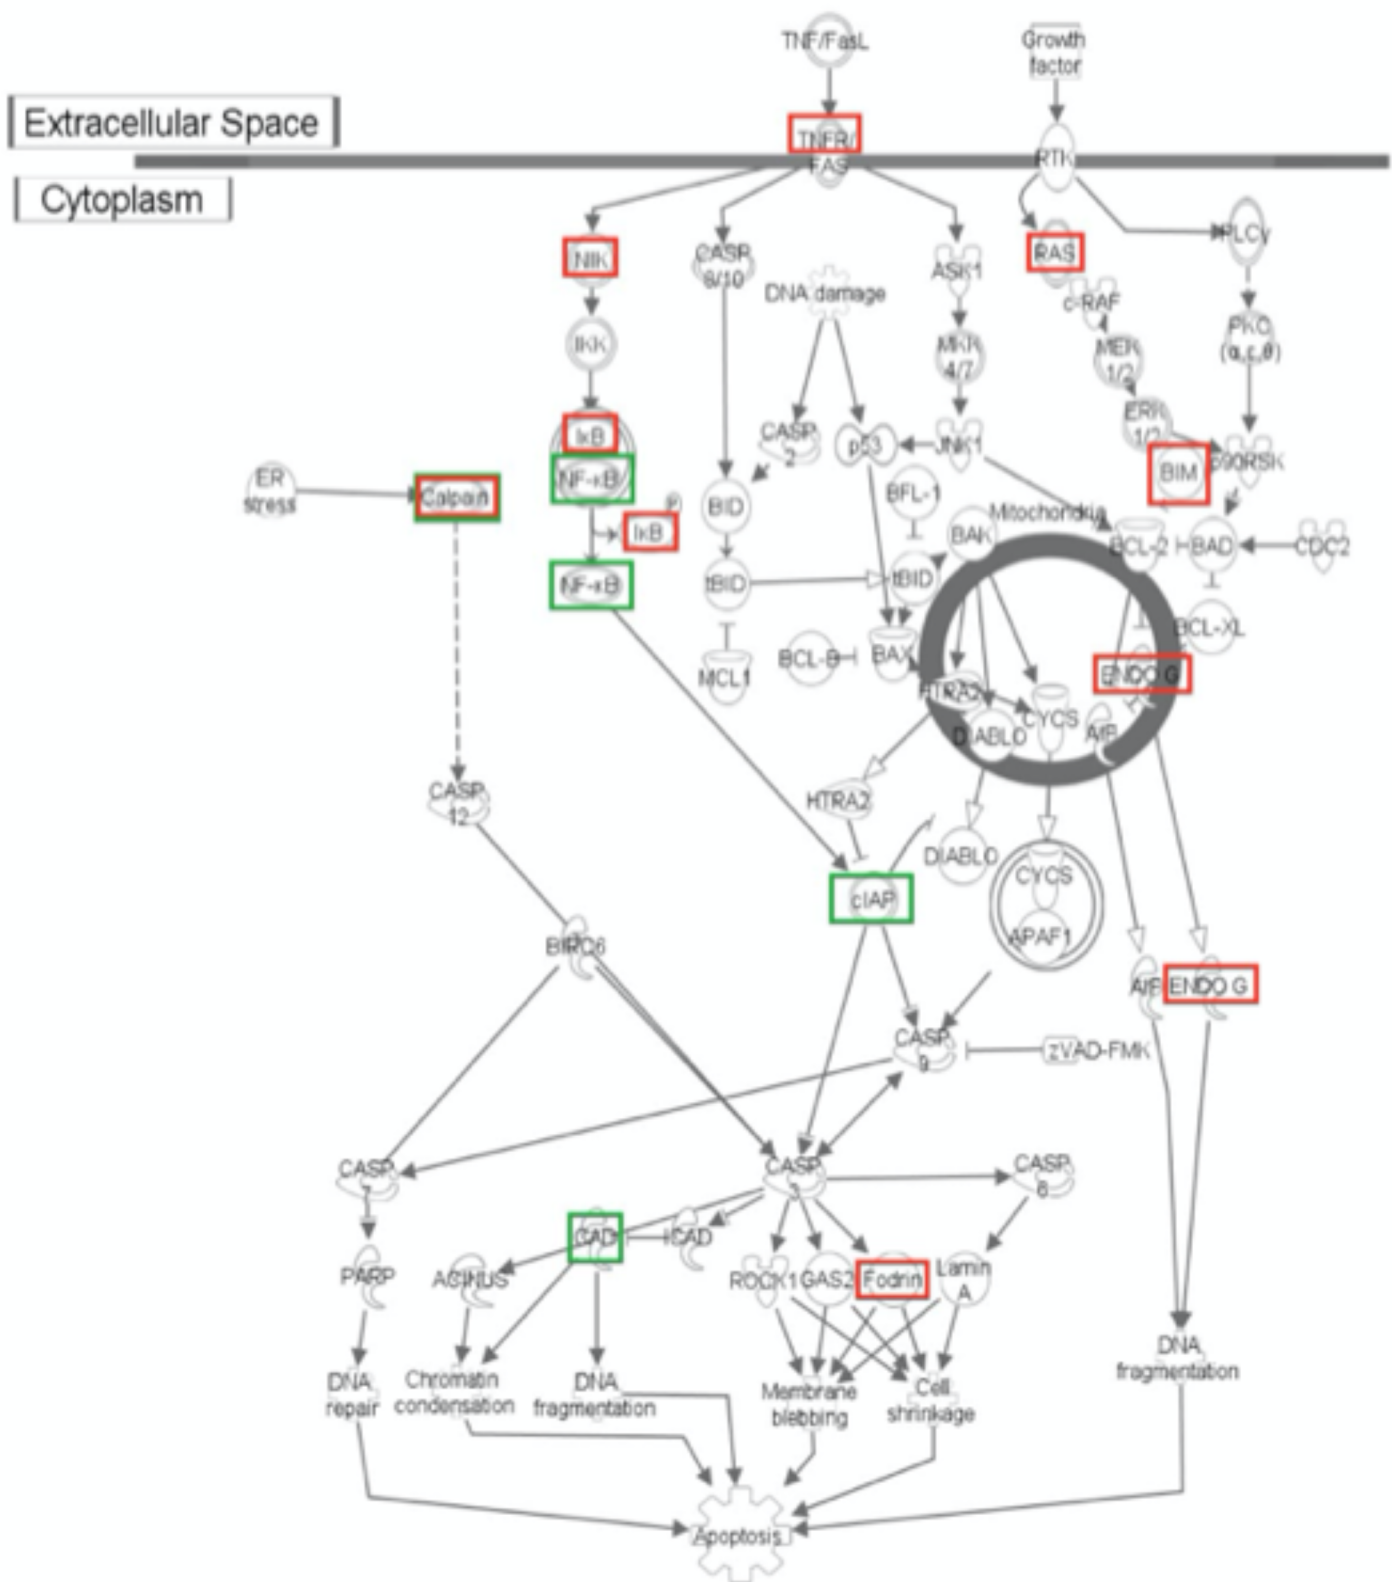

**Supplementary Figure 3.** Ingenuity pathway analysis indicating apoptosis-pathway components significantly altered after JQ1 treatment. Genes significantly up-regulated in JQ1 versus JQ1-AtT20 cells are indicated in red boxes and genes significantly down-regulated in JQ1 versus JQ1-AtT20 cells are indicated in green boxes; fold changes and p values are provided in Table 2.
