# Supplementary material for: Effects of epigenetic pathway inhibitors on corticotroph tumour AtT20 cells
Source: PubMed Central journal article supplement (PMC7040567; doi:10.1530/erc-19-0448), 2020-01-13
Supplement: supplementary_figure_5.pdf [file supplementary_figure_5.pdf]

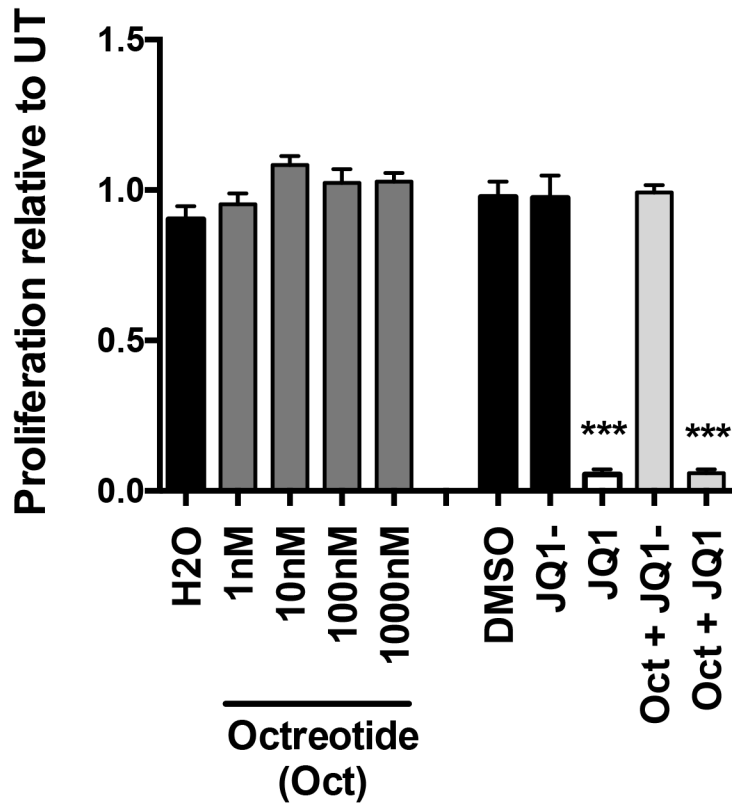

**Supplementary Figure 5.** Octreotide and JQ1 combination treatment of AtT20 cells. AtT20 cells were treated with increasing doses of Octreotide for 96h and a combination of 1000nM Octreotide with 1 $\mu$ M JQ1. Data is represented relative to untreated (UT) cells. DMSO, JQ1- and H2O were all used as negative controls. \*\*\* $p$ <0.0005.
